# Supplementary material for: Long-term magnetic anomalies and its possible relationship to the latest Greater Chilean earthquakes in the context of the seismo-electromagnetic theory
Source: Copernicus journal article supplement (doi:10.5194/nhess-2020-354), 2020-11-26
Supplement: Supplementary file [file nhess-2020-354-RC1-supplement.pdf]

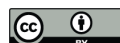

# Long-term magnetic anomalies and its possible relationship to the latest Greater Chilean earthquakes in the context of the seismo-electromagnetic theory.

Enrique Guillermo Cordaro<sup>1,2</sup>, Patricio Venegas-Aravena<sup>1,3</sup> and David Laroze<sup>4</sup>.

1. Observatorios de Radiación Cósmica y Geomagnetismo. Dep. Física, F. C. F. M. Universidad de Chile, Casilla 487-3, Santiago, Chile.

2. Facultad de Ingeniería. Universidad Autónoma de Chile. Pedro de Valdivia 425. Santiago, Chile.

3. Department of Structural and Geotechnical Engineering, School of Engineering, Pontificia Universidad Católica de Chile, Vicuña Mackenna 4860, Macul, Santiago, Chile.

4. Instituto de Alta Investigación, CEDENNA, Universidad de Tarapacá, Casilla 7D, Arica, Chile.

## Abstract

Several magnetic measurements and theoretical development from different research groups have shown certain relationship with worldwide geological processes. Secular variation of geomagnetic cut off rigidity, magnetic frequencies, or magnetic anomalies have been linked with spatial properties of active convergent tectonic margin or earthquakes occurrences during recent years. These include the rise of similar fundamental frequencies in the range of micro hertz before Maule 2010, Japan 2011, and Sumatra 2004 earthquakes and the dramatic rise of the cumulative number of magnetic anomalous peaks before several earthquakes as Nepal 2015 and Mexico 2017, among others. Currently, all of these measurements have been physically explained by the microcrack generation due uniaxial stress change in rock experiments. The basic physics of these experiments have been used to describe the lithospheric behavior in the context of the seismo-electromagnetic theory. Due to the dramatic increase in experimental evidence, physical mechanism and theoretical framework, this paper analyses vertical magnetic behavior close to the latest three main earthquakes in Chile: Maule 2010 (Mw8.8), Iquique 2014 (Mw8.2), and Illapel 2015 (Mw8.3). The FFT, Wavelet transform and daily cumulative number of anomalies methods were used during quiet space weather time during one year before and after each earthquake in order to filter space influence. FFT Method confirm the raise of power spectral density in mHz range before one month each earthquake, which decrease to lower values after some months after earthquake occurrence. The cumulative anomalies method exhibited and increase previous to each Chilean earthquake (50-90 days prior earthquakes) similar to those found for Nepal 2015 and Mexico 2017. The wavelet analyses also show as similar properties as FFT analysis. However, the lack of physics-based constrain in the wavelet analysis do not allow conclusion as strong as FFT and cumulative methods. By using these results and previous research, it could be stated that these magnetic features could give seismic information from impending events. Additionally, these results could be related to the Lithosphere-Atmosphere-Ionosphere coupling (LAIC effect) and the growth of micro cracks and electrification in rocks described by the seismo-electromagnetic theory.

## Introduction

As earthquakes are geological events that might cause great destruction, studies about their preparation stage and generation mechanism are matter of concern. That is why scientific studies ~~that gives~~ new information, evidence or insights about different physical mechanism ~~present into~~ the seismic cycle, improve our understanding of earthquakes occurrences. Currently, one of the most controversial physical mechanism that is being studied is the lithospheric electromagnetic variations as earthquake's precursory signals. Nevertheless, the study of magnetic and geological relationships is not something new. For example, the decadal variations of the geomagnetic field have been associated with an irregular flow of the outer core (Prutkin, 2008). Thus, the secular variation of the magnetic field can be interpreted as the response of the movement of the fluid outer core interacting with the topography of the lower mantle. Then, as that topography in the core-mantle boundary corresponds to a projection of the topography of the earth's surface (Soldati et al., 2012), it was not surprising that Cordaro et al. (2018) and Cordaro et al. (2019) found significant variations of geomagnetic cutoff rigidity  $R_c$  at relevant geological places in the Chilean margin.

Regarding earthquakes, many attempts to determine the location, date and magnitude of seismic movements have been made in the past (e.g. Jordan et al., 2011), but these historical efforts have failed to conclude that it is possible to use seismological data as a predictive tool (Geller, 1997). Besides, when less classical methods (e.g., electromagnetic methods) have been used some decades ago, conclusive results have not



1 been obtained either (see the debates of Varotsos et al. (1996) and Hough (2010)). Nevertheless, this  
2 scenario has changed during last year due the rise of more relevant and concluding evidences. For example,  
3 De Santis et al. 2017, 2019, showed the method of magnetic anomalies in which long-term magnetic data  
4 from different satellites (ionosphere level) were considered during quiet or no disturbed periods due the  
5 space weather. After removing known magnetospheric process from data as daily variation, the remaining  
6 magnetic perturbation or anomaly could be considered as lithospheric origin. This method allowed them  
7 to study magnetic measurements mostly free of external perturbation prior and after 16 worldwide  
8 earthquakes of magnitude approximately greater than Mw 6.5. When satellites covered areas close to each  
9 earthquake locations, they found an increase in the number of magnetic anomalies prior (1-3 months) to the  
10 occurrence of these earthquakes and a decrease after the earthquake (De Santis et al., 2017, Marchetti and  
11 Akhoondzadeh, 2018, Marchetti et al., 2019a, b, De Santis et al., 2019).

12  
13 Others methodologies also supports certain statistical correlation to earthquake's preparation phase. For  
14 instance, the rise of magnetic signals characterized by a wide range of ultra-low frequencies (5-100 mHz  
15 and 5,68 – 3.51  $\mu$ Hz) or the ionospheric disturbs before several earthquakes have been widely and  
16 intensively reported during a couple of decades (Hayakawa and Molchanov, 2002, Pulinets and Boyarchuk,  
17 2004, Varotsos, 2005, Balasis and Manda 2007, Molchanov and Hayakawa, 2008, Liu, 2009, Hayakawa  
18 et al., 2015, Contoyiannis et al., 2016, Potirakis et al., 2016, Villalobos et al., 2016, De Santis et al., 2017,  
19 Oikonomou et al., 2017, Cordaro et al., 2018, Marchetti and Akhoondzadeh, 2018, Potirakis et al., 2018,  
20 Ippolito, et al., 2020, Florios, et al., 2020, among others).

21 The magnetic phenomena not also have risen during decadal or preparation state, but also during the fast  
22 coseismic stage. For example, small magnetic variations ( $\sim 0.8$  nT) at  $\sim 100$  km were measured during the  
23 Tohoku 2011 Mw9.0 earthquake (Utada et al., 2011). Similar findings were showed by Johnston et al.  
24 (2006) during Parkfield 2004 Mw6.0 earthquake ( $\sim 0.3$  nT) at  $\sim 2.5$  km. In addition, peaks of  $\sim 0.9$  nT were  
25 measured at  $\sim 7$  km during Loma Prieta 1989 M7.1 earthquake (Fenoglio et al., 1995, Karakeliana et al.,  
26 2002).

27 The abovementioned reports have shown strong evidence of the presence of magnetic signals during the  
28 seismic preparation stage and during the rupture process itself. Up to this date, there are several experiments  
29 and theoretical models that identify and explain the physical mechanism of different magnetic variations  
30 related to geological properties (e.g. Freund, 2010, Scoville et al., 2015, Yamanaka et al., 2016, Venegas-  
31 Aravena et al., 2019, Vogel et al. 2020). According to experiments, the rise of electrical current flux within  
32 rocks is due the movement of imperfections and the suddenly growth of microcracks when rock samples  
33 are being uniaxially stressed in the semi-brittle regime (Anastasiadis et al., 2004, Stavrakas et al., 2004, Ma  
34 et al., 2011, Cartwright-Taylor et al., 2014, among others). The applied external stress generates the internal  
35 collapse of rock, which imply the fast growth of microcracks and the increase of electrical currents that  
36 flows throughout the crack right before the failure of rock samples (e.g. Triantis et al., 2008, Stavrakas et  
37 al., 2019). These currents created by this mechanism are known as pressure stimulated currents (PSC). This  
38 pre-failure indicator has been used as the experimental base for theoretical descriptions of impending  
39 earthquakes at lithospheric scale (Tzanis and Vallianatos, 2002, Vallianatos and Tzanis, 2003, Venegas-  
40 Aravena et al., 2019, Venegas-Aravena et al., 2020). This seismo-electromagnetic theory has explained the  
41 frequency range, the cumulative number of anomalies, the coseismic signals, friction states at fault, and the  
42 b-value time evolution by considering fast stress changes in the fault surrounding area. This area of fast  
43 stress changes was theorized by Dobrovolsky et al. (1979) and it could cover thousands of kilometers.  
44 Similarly, Venegas-Aravena et al. (2019) also found that the growth of microcracks and magnetic signals  
45 are hosted by these stress conditions within this large area. Recently, large areas of fast stress and strain  
46 changes, that surround the impending earthquakes, has been also confirmed by GPS analysis (Bedford et  
47 al., 2020).

48 Despite the abovementioned evidences, still there are no reports of cumulative anomalies in the Chilean  
49 margin. That is why this works present a wide study of magnetic signals which include spectral (Wavelet,  
50 Fourier), cumulative, and space weather analysis one year before and after the latest three main megathrust  
51 earthquakes in Chile: Maule 2010 (Mw8.8), Iquique 2014 (Mw8.2), and Illapel 2015 (Mw8.3). The space  
52 weather and general magnetic conditions are found in section 2. The main magnetic and frequency analysis  
53 are defined and performed in section 3. The relation between results and physical mechanism from the  
54 seismo-electromagnetic theory is section 4. Finally, discussions and conclusions are in section 5.

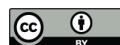

## 2. The space weather and magnetic conditions

### 2.1 External magnetic disturbances.

Before going to the study of the magnetic field and its temporal variations, it should be remembered that the rate of change of the magnetic field is influenced by the rate of variation of the spatial particle count. These are different cases of irregular and regular phenomena of the nearby space climate. Regular magnetic variation creates periodic fluctuations in the interplanetary magnetic field in a wide range of periods, from few day periods up to seasonal variations (Moldwin, 2008, Blagoveshchensky et al., 2018, Yeeram, 2019). Irregular variations occur when sudden increases of incoming solar particles are recorded across the geomagnetic field. This particle disturb induces a 10% to 20% decrease in magnetic field intensity because to the change in pressure that extraterrestrial particles exert on the magnetosphere, an effect that can last from a couple of hours to several days (Russel et al., 1999). One explication is that particles following the magnetic field lines, in the turbulent magnetic reconnection that is present in the diurnal variation and the regular variations (Priest and Forbes, 2000, Kulsrud, 2005, Cordaro, et al., 2016, Lazarian et al., 2020). Other minor irregular magnetic field as auroral events and electric current in the ionosphere are not considered for this paper (see Diego et al. (2005) for detailed description for these phenomena).

Some indexes are used in order to measure the space disturbs and its manifestation in the geomagnetic field. For example, the Kp index measure the influence of geomagnetic storms in the horizontal magnetic field (Siebert and Meyer, 1996), while Dst index is interpreted as a measure of the magnetospheric ring-current strength which is proportional to the particle's kinetic energy (e.g. Silva et al., 2017). Usually, Dst index could increase dozens or hundreds of nT during magnetic storms ( $K_p > 4$ ), that is why it is important to incorporate these indexes to create reliable magnetic models.

### 2.2 Secular variation in the Chilean convergent margin

The magnetic response to these disturbances requires a reference model that allows to discriminate earth's magnetic features from disturbs that spreads throughout interplanetary magnetic field. One of those features corresponds to the magnetic shielding against incoming turbulent particles which is known as geomagnetic cutoff rigidity  $R_c$  (Pomerantz, 1971). The rigidity  $R_c$  is defined as the product of the force of the magnetic field and the curvature radius of the incident particle  $r_g$  and it can be estimated globally by using the Tsyganenko magnetic field model (for details see: Smart et al., 2000, Smart and Shea, 2001, Tsyganenko, 2002a, 2002b). The  $R_c$  variations describes geomagnetic secular variations which could be related to geological features in the Chilean margin (Pomerantz, 1971, Shea and Smart, 2001, Smart and Shea, 2005, Herbst et al., 2013, Cordaro et al., 2018, Cordaro et al., 2019). For example, regarding to latitudinal effect (Pomerantz, 1971), Cordaro et al. (2019) found that the highest variation rate of effective  $R_c$  values were obtained at  $46.5^\circ\text{S}$ ,  $76^\circ\text{W}$  and at  $52^\circ\text{S}$ ,  $76.5^\circ\text{W}$  (Figure 1). The first one is in the Taitao Peninsula, Chile which corresponds to the triple junction point of three tectonic plates: Nazca, South America, and Antarctica. The second one is close to Puerto Natales in the Strait of Magellan area, also a triple junction point of three tectonic plates: South America, Antarctica and Scotia (Figure 1). There are others geological and geomagnetic links as the flat slab in the Chilean convergent margin (Cordaro et al. 2018, Cordaro et al. 2019). However, these results are not surprisingly, because changes in  $R_c$  represents secular variations that represents magnetic secular variations created at the outer core (Bloxham et al., 2002, McFadden and Merrill, 2007, Sarson, 2007, Finlay, 2007, Herbst et al., 2013). Specifically, 3D models of core mantle boundary (CMB) topology based on the velocities of seismic waves (Simmons et al., 2010) show the existence of positive topography in up thrust regions and negative topography in subduction zones (Yoshida, 2008, Lassak et al., 2010, Soldati et al., 2012). Let us remark that the intensity of the geomagnetic field at within the outer core it is estimated to be of the order of 2-4 mT (rms) (Olson et al., 1999, Olson, 2015), while at earth surface varies between 20,000 and 60,000  $\times 10^{-9}$  T.

The most relevant magnetic feature in the Chilean sector is the low magnetic intensity values that correspond to the influence of the South Atlantic Magnetic Anomaly (SAMA) (e.g. Cordaro et al., 2016). Recently, Tarduno et al. (2015), argued that SAMA is being created by a topography structure in the CMB beneath south Africa. SAMA is not only linked with global magnetic features as geomagnetic dipole moment (e.g. Heitzler, 2002, Gubbins et al., 2006), it is also corresponding to the closer area between earth's surfaces and radiation belt. This proximity allows more charged particles and more disturbances in the magnetic field near the Chilean margin (e.g. Kivelson and Russell, 1995). That is why a proper magnetic response to external disturbances is required before and after earthquakes occurrences.



## 2.3 Magnetic perturbation during seismic events of 27/2/2010 in Maule, 1/4/2014 in Iquique and 16/9/2015 in Illapel.

The manifestation of space climate in the geomagnetic field during the periods concerned is defined by the Kp magnetic activity index as shown in Figure 2 for the months previous to the three earthquakes: Maule 2010 (Dec 12, 2009 to Mar 15, 2010), Iquique 2014 (Jan 1, 2014 to Apr 15, 2014) and Illapel 2015 (Jul 1, 2015 to Sep 30, 2015). For Maule 2010 the magnetic activity reached a Kp index equal to or greater than 4 on only three isolated occasions, it is therefore considered a calm period; for Iquique 2014, activity was concentrated around Feb 19, 2014 while for Illapel 2015 the maximum activity was recorded between September 8 and 10. In all three cases, activity did not persist in time. In fact, according to figure 2, there are no evidences of an increase in the amount of external magnetic perturbations prior each earthquake.

## 3 Main magnetic evolution and frequency analysis

Magnetic measurements and analysis are carried out in this section. The main aim of this section is to use different magnetic methodologies and figure out which of them seems more earthquake-related origin. The stages correspond to the long-term magnetic evolution, the simple frequency analysis, wavelet and anomaly analysis. Stations used here are Putre (PUT), Easter Island (IPM, also known as Isla de Pascua), Los Cerrillos (CER), Pilar (PIL), Osorno (OSO) and Laboratorio antártico de radiación cósmica (LARC). See Figure 1 for their location and information of PUT, CER and LARC in Table 1. In the case of PUT and IPM, the Dobrovolsky area and the earthquake distances will be used in the following subsections (Table 2).

### 3.1 Long-term magnetic records

A high correlation between the vertical component of the earth's magnetic field and seismic activity at the Putre station was found (Cordaro et al., 2018). That is why we seek to specify this behavior in a shorter time window than the period studied previously (1975-2010). In addition, the  $B_z$  component in Ester Island (IPM) station is also used because it has not been thoroughly investigated (Note that the IPM station was closed in 1968 and subsequently reactivated in 2008 by the French INTERMAGNET Group and the Meteorological Service of Chile) (Chulliat et al., 2009, Soloviev et al., 2012). The Putre observatory is at  $18^{\circ}11'47.8S$ ,  $69^{\circ}33'10.9W$ , 3,598 m.a.s.l (meters above sea level); and it is located on the western edge of the South American Plate. This zone includes the South Atlantic Magnetic Anomaly (SAMA), the center of which is 1,700 kilometers east of this observatory. The measurements confirm low  $B_z$  values at the station Putre. The instrument error of the geomagnetic measurements is of the order of 5 nT (Cordaro et al 2012). IPM is located at  $27.1^{\circ}S$ ,  $109.2W$ , 82,83 m.a.s.l, on the western edge of the Nazca plate, characterized as a hotspot (e.g. Vezzoli and Acoocella, 2009). OSO is located in the coordinates  $40^{\circ}20'24''S$ ,  $74^{\circ}46'64''W$  and PIL at  $31^{\circ}40'00.0''S$ ,  $63^{\circ}53'00.0''W$  (Figure 1).

In the Putre, a diminution in the values of the whole magnetic field and each of its components is found. This can be attributed to the fact that Putre observatory is influenced by the South Atlantic Magnetic Anomaly, while on Easter Island the influence of SAMA is weaker (Storini et al., 1999). These magnetic influences are also found in Los Cerrillos observatory. The scientific and technical characteristics of the Putre (PUT) and Los Cerrillos observatories, i.e. location, altitude, atmospheric depth, type of detectors, geomagnetic cutoff rigidities and operating times, may be found in Refs. (Cordaro et al., 2012, Cordaro et al., 2016) while for Easter Island (IPM) the information is available in SuperMag Network (Chulliat et al., 2009, Gjerloev, 2012). The main characteristics for the observatories as location, altitude, atmospheric depth, type of detector, and operations time, are shown in Table 1.

Measurements of the  $B_z$  component are represented in Figure 3. We observe that similar gradients in Iquique 2014 and Illapel 2015 to those found in Maule 2010, giving rise to a jump in each case. It is known that these magnetic signals are generated by the earth's core and disseminated through the mantle, implying changes in its electrical conductivity (Stewart et al., 1995).

The jump in the  $B_z$  component for Maule 2010 was recorded in the Putre station on Jan 23, 2010 (purple solid line in Figure 3a), a time lapse of 36 days before the earthquake (solid red line) and the moment at which a change appears in the gradient or trend. It alters from a diminution of 225 nT in the period Oct 31, 2009 to Jan 23, 2010, to a less abrupt diminution of 30 nT between Jan 23, 2010 and Apr 3, 2010; prior to





the jump on Jan 16, 2010 there is a small, abrupt diminution from -5048 nT to -4927 nT. Discounting this small, abrupt diminution, the delta between the gradients falls from -4960 nT to -4926 nT,  $\Delta = 34$  nT as it is shown in Figure 3a.

For Iquique 2014 the jump recorded in Putre (Figure 3b) occurred on Dec 27, 2013 (purple solid line), a time lapse of 96 days before the earthquake (red solid line). A change appears in the gradient on this date from a diminution of 123 nT in the period Nov 14, 2013 to Dec 27, 2013, to a diminution of 113 nT between Dec 27, 2013 and Apr 15, 2014; the jump presents a change from -7355 nT to -7235 nT,  $\Delta = 120$  nT as it is shown in Figure 3. For Iquique 2014 the jump measured at IPM occurred on Apr 3, 2014, a time lapse of 91 days before the earthquake (Figure 3c). The trend shows a slight increase between Sep 30, 2013 and Jan 3, 2014, from -19116 nT to -19104 nT, while a further slight increase occurs in the period Jan 3, 2014 to May 6, 2014, from -19101 nT to -19099 nT. Note that the size of the jump was -3 nT as it is shown in Figure 4. For Illapel 2015 the jump measured at IPM occurred on Aug 31, 2015, a time lapse of 16 days before the earthquake. The trend shows a slight diminution between Aug 31, 2015 and Sep 20, 2015, from -19054 nT to -19072 nT, a jump of -11 nT, as one can observe in Figure 3d.

### 3.2 Simple Fourier analysis,

Regarding the frequency analysis, the frequency spectrum values were analyzed for the Maule, Iquique and Illapel earthquakes using the second derivative of the vertical component at PUT and IPM stations. Fundamental frequencies before these earthquakes ranged from 5.606 to 3.481  $\mu$  Hertz or from 1 cycle / 48.9 hours to 1 cycle / 79.13 hours (Figure 4a). The increase in one or a group of frequencies reflects the oscillations of the radial magnetic field whose oscillation period takes from ~2 to ~4 days. Specifically, in the Maule event, peaks for the frequencies 4.747; 5.064 and 5.154  $\mu$  Hz were recorded (blue squares in Figure 4a). In Iquique peaks of 4.611; 4.882 and 5.154  $\mu$  Hz were recorded (black dots in Figure 4a), and for Illapel, 3.739; 4.630 and 5.520  $\mu$  Hz (red rhombuses in Figure 4a).

In order to identify a temporal domine where these frequencies arise, FFT is applied each 20 days as a fist approximation (Figure 4b, c). Before the Iquique 2014 event a jump in intensity was observed associated with the frequency, of 5.154  $\mu$  Hz for the period Dec 27, 2013 to Jan 11, 2014, i.e. after the jump (Figure 3b, Figure 4b). Similar frequencies (3.739  $\mu$  Hz) rise during Sep 1, 2015 to Sep 8, 2015 before the Illapel 2015 event (Figure 4c). These findings imply a more detailed methodology in order to study the origin of these frequencies.

### 3.3 Wavelet

We have used the wavelet transformation to analyze localized versions of power within a geomagnetic time series, in this way it can break down a time series into the time frequency space, determine the dominant modes of variability and how they vary over time (Torrence and Compo, 1998). Here, the goal is to look for the rare variations that could not be attributed to space weather in the daily average measurements. According to Cordaro et al. (2018), the vertical component of the magnetic field showed variations related to Maule 2010 earthquake. That is why values of vertical component of the geomagnetic measurements at OSO station were considered. Note that OSO station is the closest station to the main earthquake. In order to avoid the space weather influence, highest variations where not considered. One way to perform these two restrictions, ~~is by mean the consideration of statistical analysis~~. For example, a lower and upper threshold could be defined by using the standard deviation. That is, consider bigger magnetic peaks, but no to bigger because it could be related to space weather conditions. An example of this statistical analysis can be found in Figure 5 when an upper threshold of 2 standard deviation is used. There, the spectral analysis shows a dramatic increase 30 days before Maule earthquake and a decrease 10 days after the earthquake occurrence. The frequencies that rise comprise a range close to 3-5  $\mu$  Hz. Note that no other significative increase is seen during the 2 years of measurements. ~~Despite this promise methodology, the daily average and the upper threshold, an improved implementation of the space weather, more standard anomalies and frequencies analysis is required.~~

### 3.5 Anomaly analysis

In order to identify and discriminate external variations from those that could be considered as lithospherical (variations with lithospherical origin), this subsection handle the definitions of anomalous variations. This definition will be obtained considering the external perturbation by using the Dst index (<http://wdc.kugi.kyoto-u.ac.jp>). Then, spectral analysis will be performed. Additionally, the data used in

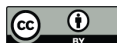

this subsection is standard and comes from the supermag network (<http://supermag.jhuapl.edu/>). The data has a sampling frequency of one data per minute, and a period of one year before and one year after each earthquake was chosen.

### 3.5.1 Magnetic threshold definition

In the method for cumulative magnetic anomaly in surface of earth, we used statistically an atypical or anomalous value, that is, data that is quite far from the average values of the sample. So, we compare real values of  $B_i$  with a more representative value of the sample, its average  $B_{ave}$ . We will call the difference between the two as the magnetic residual  $\Delta B$ . By using the distribution of data, we can define when a value is atypical or anomalous in a normal distribution by statistical definitions of quartiles and outliers.

First, we create a filter that eliminates the frequencies averaged near Nyquist and establishes a filter that eliminates high frequencies. The option was to consider a moving average of five points weighted:  $B_{ave} = aB_{i-2} + bB_{i-1} + cB_i + bB_{i+1} + aB_{i+2}$ . Here, other researchers use cubic splines instead of Moving Average (e.g. De Santis et al., 2017). In our case we use  $a = 0.07$ ,  $b = 0.25$  and  $c = 0.5 - 2a$ . The uncertainty of the Flux-gate magnetometers (supermag) used in the OSO and PIL station is  $\delta B = \pm 0.1$  nT, which allows us to calculate the error propagation for averaged data  $\delta B = \delta B_i + \delta B_{ave} = \pm 0.2$  nT, then the total uncertainty is  $\Delta B_i + 0.2$  nT. Statistically,  $0.6745\sigma$  represents 50% of the data that is closer to the average. So that 50% of the data farther from the average should be added. Then we consider as anomaly  $\delta B_a$  all the magnetic variations that are found at an amount  $|\delta B_a|$  of the average value. If the threshold to define the far points is 50% plus the error, then the equation to define the threshold or anomalies is  $|\Delta B_a| \geq 0.6745\sigma \pm 0.2$  nT. Where  $\sigma$  is the standard deviation from each record. Then, the anomalous measurements are defined by the data itself when this definition is used. The vertical magnetic thresholds are 0.2246995 nT at OSO (Feb 27, 2009 – Feb 27, 2011), 0.2362868 nT at PIL (Apr 01, 2013 – Apr 01, 2015) and 0.2352825 nT at PIL (Sep 16, 2014 – Sep 16, 2016).

Regarding the external contribution, the data considered are for quiet periods  $Dst < 10$  nT, and only quiet magnetic data between 16:00 to 05:00 local time (Hitchmn et al., 1998). Some researchers who have used satellites consider only the time periods in which the DST index is less than or equal to 20 nT (e.g. Marchetti and Akhoondzadeh, 2018), or equal to 10 nT (e.g. De Santis et al., 2017).

### 3.5.2 Spectrogram

The filtered data correspond is a strong candidacy of lithospheric magnetic origin. This mean that any spectral analysis could reveal lithospheric variations. That is why Spectrograms are performed. The spectrogram corresponds to the application of the moving Fourier transform. Here, the temporal windows size is 1 month with a 50% of overlap (see Rabiner and Schafer (1980) and Oppenheim et al. (1999) for spectrogram theory and application). The OSO and PIL spectrograms for Maule 2010, Iquique 2014 and Illapel are shown in Figure 6.

In the Maule 2010 event, the spectrogram of the vertical magnetic component at OSO station shows that the low frequency behavior around  $\sim 1$ –2.2 mHz appears to increase spectral density before Feb 27, 2010 (Figure 6a). Specifically, the highest frequencies appear between Jan 10, 2010 – May 02, 2010. That is more than one month before Maule earthquake. Additionally, the spectral density reduces their activity after  $\sim 2$  months the earthquake. The spectrogram for Iquique 2014 is marked with two peaks, one corresponding to September 22 and the other close to March 08 (Figure 6b). The frequency range comprise between around 1.2 to 2.7 mHz. However, the main peak occurred during march with a frequency of 2.5 mHz. In Figure 6c the Illapel 2015 spectrogram is shown. Here it can be seen that almost the entire period was characterized by a close to zero frequency variations. Nevertheless, the onset of the frequency rise start closes to Aug 06, 2015 and last up to Oct 27, 2015. In the middle, a gap appears because the lost of frequency information owe strong spatial activity during September 2015. Despite this, is clear that the earthquake occurrence lies during periods of high frequency activity.

These frequency analysis shows that the three earthquakes occurred during the presence of ultra-low frequencies in the vertical magnetic component. In addition, these frequencies vanish or reduce their intensity during other time periods. Other authors have claimed that other magnetic features that accompanies ultra-low frequencies is the increase of the magnetic anomalies (e.g. De Santis et al., 2017). This mean that the magnetic oscillations are produced by peaks in the magnetic records. By following the



Venegas-Aravena et al. (2010) findings, the number of these peaks should increase (decrease) in time before (after) earthquake occurrences.

### 3.5.3 Cumulative daily anomalies

By following the anomaly definition (subsection 3.5.1), it is possible to find out the daily number of anomalies. For example, in Figure 7 is shown the case of OSO station. Black dots follow a stable linear increase in the number of cumulative anomalies (red line). Nevertheless, this tendency breaks close to Jan 11-12, 2010. From that day up to the first week of April, the number of anomalies experience a dramatic increase. In the middle of this increase, the Maule earthquake hit (Feb 27, 2010). By subtracting the initial linear tendency and comparing to PIL station (Iquique 2014 and Illapel 2015), the sigmoidal feature is clearer (Figure 8). The anomalies start to increase prior each earthquake. For example, this increase start ~47 days before Maule 2010 earthquake, ~90 days before Iquique 2014 earthquake and ~60 days before Illapel 2015 earthquake (Figure 8).

Other researchers have used very different implementations, definitions, methodologies, and data in order to find out these anomalies. For example, Marchetti and Akhoondzadeh, (2018) have also found a sigmoidal signature in the anomalies of the Y components recorded by different satellites for the Mexico 2017 earthquake. In order to compare Mexico 2017 with Maule 2010, Iquique 2014 and Illapel 2015, the initial linear trend has been removed (Figure 9). The initial onset of anomalies increases start close to 60 day prior the Mexico 2017 earthquake. Note that in the four cases, the sigmoidal features are almost the same: a lineal stable number of anomalies characterize the initial period. Then, a dramatic increase in the number of daily anomalies is followed by the main earthquake. This time is different in each earthquake but it lies between 50 – 90 days after the initial anomalies increases. After the seismic events happens, the cumulative numbers behave not similar. For example, in the Mexico 2017 earthquake, the anomalies remain stable, while in the Maule 2010 still is increasing in a less dramatic manner. At the end of the OSO measurements, several anomalies appear, but it is not clear that these events could be related to other seismic events. In order to understand the physics that lies in these events, a theoretical mechanism is required.

## 4.-Magnetic anomalies and fracture mechanics by considering the seismo-electromagnetic theory.

The frequency analysis (Figure 5, 6) and cumulative number of magnetic anomalies (Figures 7, 8, 9) shows an increase (spectral intensity and anomalies number) before each earthquake occurrences. In the anomalies case, a clear sigmoidal feature rise in Maule, Iquique and Illapel, which is a similar behavior recorded in the Mexico earthquake (Figure 9, Marchetti and Akhoondzadeh, (2018)). This indicate that anomalies behavior could correspond to a lithospherical origin. Currently, it has been shown that the origin of these anomalies is associated with the cracking (or micro-cracking) of the semi-fragile-ductile part of the lithosphere (crust) due to changes in stress (Venegas-Aravena et al., 2019). Typically, strain appear when solids undergoes loads or stress accumulation. However, micro-cracks rise specifically when solids do not hold more deformation and prior the main failure (e.g. Stavrakas et al., 2019, Li et al. 2020). Experimentally, it has been shown that these conditions break the electrical neutrality within materials and generate an electrical flux through rocks in a process known as pressure stimulated currents or PSC (e.g., Anastasiadis et al., 2004). Furthermore, it has been shown that PSCs can explain that the fractal nature of cracks is sufficient to generate the frequency spectrum, co-seismic variations, the generation and behavior of anomalies, and variation in the ionosphere in a theory known as seismo-electromagnetic theory (Venegas-Aravena et al., 2019). Regarding the time evolution of magnetic anomalies, De Santis et al. (2011) have shown that the sigmoidal shape is owe to a manifestation of the stress changes when it is reaching a critical point. Nowadays, theoretical development, geodynamical measurements, and experimental studies have shown that the sigmoidal shape appears as a consequence of the dramatic increase in the number of micro cracks (at a depth of few tens of kilometers) prior the main earthquake ruptures (De Santis et al., 2015, Stavrakas et al., 2019, Venegas-Aravena, et al., 2019).

A schematical representation of the crack generation in the geodynamical context can be seen in figure 10. At the initial time  $t = t_0$  the intact lithosphere undergoes a uniaxial non-constant stress  $\sigma$  (Figure 10a). Then the first signs of micro cracks appear at  $t = t_1$  due the increase of the stress (Figure 10b). When the lithosphere can not hold more deformation, a dramatic increase in the crack generation appear throughout the lithosphere ( $t = t_2$  in Figure 10c). At this point ( $t = t_3$  in Figure 10d), the crack generation is not sufficient to release the excess of uniaxial stress. Then the lithosphere cannot release energy by neither deformation nor crack generation mechanism. That is why the rupture (earthquake) occurs (green area in Figure 10d) at  $t = t_4$ . After the main rupture, other aftershock occurs (green smaller patches within the



1 fault in Figure 10e). Nevertheless, the number of anomalies start to decrease. Finally, the micro crack  
2 generation stops because the deformation is sufficient to handle the lithospheric response to non-constant  
3 uniaxial stress (Figure 10f).

4  
5 Additionally, Venegas-Aravena et al. (2019) found that the increase in the number of anomalies are  
6 controlled by the same fractal nature that drive the micro crack generation. This means that the frequency  
7 of the electrical flux could covers several magnitude orders. For example, figures 4, 5, and 6 are  
8 characterized for the rise of different frequencies (micro to mili Hertz), which are known as ultra-low-  
9 frequency (ULF), prior main earthquakes. These frequencies ranges were also found and described by  
10 others researches as Fenoglio et al. (1995), Vallianatos and Tzanis (2003), Fraser-Smith (2008), De Santis  
11 et al. (2017), Cordaro et al. (2018), among others.

12  
13  
14 Finally, it has been concluded that there must be precursory magnetic anomalies of the order of 0.1 nT  
15 related to earthquakes on the earth's surface (e.g. De Santis et al, 2017, Chernogor, 2019, Venegas-Aravena  
16 et al., 2019). In the previous section, it was found that the minimum value to define an anomaly was close  
17 to 0.2 nT. Therefore, this experimental result is in agreement with the theoretical value obtained.  
18 ~~Consequently, according to the Seismo-electromagnetic theory indicates that the anomalies may have a~~  
19 ~~lithospheric origin.~~ Furthermore, the behavior of all these anomalies has a preceding increase similar to that  
20 of other seismic events that use different data and methods (e.g., De Santis et al., 2019 and references  
21 therein).

## 22 23 5.- Discussions and Conclusions.

24  
25 The most significant characteristics of the magnetic field and its variations are found in the z-component,  
26 which we have observed and recorded at the Putre and IPM observatories. The previous measurements  
27 show that there is evidence of a progressive increase in the phenomenon known as the South Atlantic  
28 Magnetic Anomaly (SAMA) (Cordaro et al., 2019). As expected, it generates a significant deviation in the  
29 intensities present in the OP station as it is shown in the magnetic iso-values (Figure 1). Combining this  
30 information with data from the IPM station, the behavior of the radial component of the geomagnetic field  
31 for the three most significant seismic events in the Chilean Pacific sector during the period 2010-2015 was  
32 recorded, and it corroborates the magnetic relation with seismology shown in Potirakis et al. (2016),  
33 Contoyiannis et al. (2016), De Santis et al. (2017), which have been used other methods.

34  
35 The normal magnetic trend showed some long-term variations. For example, there were breaks in the trend  
36 or jump of  $B_z$ , followed by a time-lapse, and seismic movement as one can observe Figure 3. These jumps  
37 occur in different forms: in Putre they are significant, reaching values of tens of nT, while in IPM the jump  
38 is barely 10nT. The time lapse between each jump and the seismic event differs in each event. For Maule  
39 2010 it was 36 days, for Iquique 2014 it was 96 days, and for Illapel 16 days. This time difference may be  
40 due to an important factor: it appears that the jump is not equally strong in the three events, since the jump  
41 before the Iquique 2014 event was considerably. weaker than the one before Illapel 2015, and preceded the  
42 event by a longer time lapse (96 days). The more abrupt jump recorded in Illapel was followed by a shorter  
43 time lapse (16 days). These changes are notorious, that is why a first approach by using frequency analysis  
44 were done.

45 Specifically, significant frequencies data obtained for Maule earthquake Chile, 2010, range from 4.747 to  
46 5.154  $\mu$  Hz, for Tohoku earthquake. Japan 2011 from 4.747 to 5.606  $\mu$  Hz, for Sumatra earthquake  
47 Indonesia 2004 from 3.481 to 5.425  $\mu$  Hz (Cordaro, et al 2018). These fundamental frequencies were  
48 detected before the earthquake in the areas of Pacific Ocean in the Southern Hemisphere, in the Eurasian  
49 (2011) and Philippine (2004) areas in the Northern Hemisphere. Now these significant frequencies are  
50 obtained again in different places and time on earth: in Iquique 2014, peaks of 4.611, 4.882, and 5.154  $\mu$   
51 Hz and for Illapel 2015, 3.739, 4.630, and 5.520  $\mu$  Hz (Figure 4). Up to this point, the rise of these  
52 frequencies could be thought as a normal magnetic behavior ~~which a~~ high degree of coincidence. That is  
53 why, other methodologies were performed in order to clarify the origin of these frequencies.

54  
55 ~~In order to avoid bias or technical malfunction, here and after~~ we decided to use different stations that  
56 belong to an international network with opensource data (supermag). These stations (OSO and PIL) were  
57 the closest to the three earthquakes that had continuous measurements. The time period was 1 year before  
58 each earthquake and 1 year after, giving 6 years of combined measurements where the frequency sample  
59 was 1 data per minute.  
60



The first approach was performed by using wavelet analysis at OSO station. Here, in order to avoid normal variations and external perturbation, daily average values were performed by imposing a lower and upper restriction before to apply wavelet analysis. The Figure 5 shows the increase of the frequency range ( $> 2 \mu$  Hz) 30 days before Maule 2010 earthquake. These frequency activities last up to  $\sim 10$  days after the earthquake. Despite the abovementioned results, the previous restrictions might be seen as arbitrary. That is why we moved to a stricter, stronger and bias-free methodology.

The definition of magnetic anomalies was performed in sub section 3.5.1. There, the anomalous magnetic variations were defined by using statistical analysis. That is, one variation or peaks will be considered anomalous if it reaches values beyond a certain threshold, threshold defined by the same data. In order to avoid the external perturbations, Dst index and quiet time were considered. This give 6 years of combined data with variations that could be associated to lithosphere or internal. An increase in the frequency range ( $\sim 1$  mHz) before each earthquake was obtained after applying spectrogram analysis (Figure 6). If we look at those periods not close to the earthquake's occurrences, almost no frequency activity was recorded. In addition, these frequencies can not be considered as part of tidal effects because the last one belongs to a different frequency range ( $\sim 0.01$ - $0.06$  mHz) (Casotto and Biscani, 2004, Park et al., 2005). This imply that Maule 2010, Iquique 2014 and Illapel 2015 occurred during very high frequency activity. As the considered data is free of external perturbations, and earthquakes occurrences are within these frequencies' activations, the idea of the existence of lithospheric frequencies related to earthquakes are reinforced.

In order to compare these data with other results, we have performed the count of the daily anomalies. Here, the anomalies behave as a sigmoidal function (Figure 7, 8, 9). In all of the earthquakes was found a dramatic increase in the number of anomalies between 50 to 90 days before each earthquake. This long-term behavior is similar to those found in Nepal 2015 (De Santis et al., 2017), Mexico 2017 (Marchetti and Akhoondzadeh, 2018), Central Italy (Marchetti et al., 2019a), Indonesia 2018 (Marchetti et al., 2019b) or other big earthquakes worldwide (De Santis et al., 2019). Note that the abovementioned studies performed satellite data in contrast with this study that uses ground-based magnetometers and different methodology. Additionally, the station election was following the preparatory phase described by Dobrovolsky et al. (1979). This mean that any magnetic station, close to impending earthquake ( $\sim 1000$  km), should detect anomalies or the lithospheric microcracking beneath Earth's surface. The horizontal distance of the preparation phase also agrees to geodetical findings. For example, Bedford et al. (2020) found a preparation phase characterized by a high increase in the strain close to  $\sim 1000$  km in subduction margin.

~~By considering the results, the physical mechanism known from the seismo-electromagnetic theory is explained~~ (section 4). This theory explains different empirical observations that indicate a direct relation between magnetic fields and earthquakes in which one the essential group of measurement corresponds to the recording of ultra-low-frequency magnetic signal, mainly close to millihertz and microhertz (Venegas-Aravena et al., 2019, 2020). Here, the anomalies correspond to the manifestation of the crack or micro crack within the lithosphere which allows the flux of electrical current. The temporal evolution of these cracks and its relation to the sigmoidal magnetic anomalies' behavior can be seen in Figure 10. The framework of this theory state that the micro cracks appear as a consequence of the excess of shear stress that cannot be releases by the lithospheric deformation (Venegas-Aravena et al., 2019). Then, frequencies rise and anomalies behavior should be considered as a manifestation of the lithospheric internal collapse at the last stage (preparation stage) of the seismic cycle, when solids cannot hold more strain.

Regarding the mechanism that generates the micro-cracks, we found that the minimum value to define an anomaly was close to  $0.2$  nT, and this experimental result is in agreement with the theoretical value obtained in Venegas-Aravena et al. (2019), where a  $\sim 0.2$  nT rise when cracks are created at the semi-brittle ductile regime (depth of  $10$ - $20$  km).

Let us mention that the frequencies obtained by the Fourier analysis and anomalies are inherent to the lithosphere. The variation of the low frequencies before the earthquake in the magnetic field is due to the ionosphere-atmosphere-lithosphere coupling. We have shown that the frequencies in  $\mu$ Hz are related to the Maule earthquake in 2010 ( $M_w 8.8$ ) (Cordaro et al. 2018). Also, the work of Vallianatos and Tzanis (2003) shows that the magnetic field frequencies are possibly related to earthquake included in a range of at least three orders of magnitude and finally detecting a month before the earthquake in the range of frequencies between  $5$  - $100$  mHz based on the Ionosphere-Lithosphere-atmosphere coupling.





We also remark that the possibility to predict the future occurrence of these seismic events is not yet possible because the seismological mechanism of seismic movements is not yet precise. However, a correlation does appear to exist between a cumulative number of magnetic anomalies, time-lapse, frequency arise, and the Maule 2010, Iquique 2014, and Illapel 2015 earthquakes. This could be used as a tool to show the behavior of some geophysical variables to indicate plate movements in the future. This condition, based on the increase of low frequencies in the range of ( $\mu\text{Hz} - \text{mHz}$ ) suggests that these magnetic variations in the radial component are probably a necessary but not sufficient condition on the Chilean margin. Further investigations on this subject are required.

The next experimental step in this analysis is to gather the measuring instruments of the network (magnetometers, Neutrons, others) and their variables recorded in the lithosphere, ionosphere, magnetosphere, cosmic rays particles,) as neutrons, making a synapse or communication between them, in real time (Learn Machine Method, Others), in order to detect, directions, intensities, start and end of frequencies, magnetic clusters, anomalies, or others, that could allow us to generate a warning prior to a seismic movement.

## Acknowledgments

The authors thank Dr. L.A. Raggi (Incas-U.Chile) for their collaboration and support. The fluxgate magnetometer at Putre-Incas Observatories is partially supported by FCFM-University of Chile, and Tarapaca University (Chile). LARC observatory The Chile/Italy Collaboration via U. Chile (Chile), PNRA (ITALY) supports, and INACH partial support. The results presented in this paper rely on data collected at magnetic observatories. We thank the national institutes that support them and INTERMAGNET for promoting high standards of magnetic observatory practice ([www.intermagnet.org](http://www.intermagnet.org)). E. G. Cordaro acknowledges Marcela Larenas and Francesca, Beatriz and Enrique for outstanding support to carry out this work.

## References

- Abad, M., Izquierdo, T., Cáceres, M., Bernárdez, E., Rodríguez-Vidal, J.: Coastal boulder deposit as evidence of an ocean-wide prehistoric tsunami originated on the Atacama Desert coast (northern Chile). *Sedimentology* 67, 1505–1528, 2020.
- Anastasiadis, C., Triantis, D., Stavrakas, I., and Vallianatos, F.: Pressure Stimulated Currents (PSC) in marble samples. *Ann. Geophys.*, 47, 21–28, doi: 10.4401/ag-3255, 2004.
- Balasis, G. and Manda, M.: Can electromagnetic disturbances related to the recent great earthquakes be detected by satellite magnetometers? *Tectonophysics*, 431, 173–195, doi: 10.1016/j.tecto.2006.05.038, 2007.
- Bedford, J.R., Moreno, M., Deng, Z., Oncken, O., Schurr, B., John, T., Báez, J.C. and Bevis, M.: Months-long thousand-kilometre-scale wobbling before great subduction earthquakes. *Nature* 580, 628–635 (2020), doi: 10.1038/s41586-020-2212-1, 2020.
- Blagoveshchensky, D. V., Maltseva, O. A., and Sergeeva, M. A.: Impact of magnetic storms on the global TEC distribution, *Ann. Geophys.*, 36, 1057–1071, <https://doi.org/10.5194/angeo-36-1057-2018>, 2018.
- Bloxham, J., Zatman, S. and Dumberry, M.: The origin of geomagnetic jerks. *Nature* 420, 65–68 (7 November 2002). doi: 10.1038/nature01134, 2002.
- Cartwright-Taylor, A., Vallianatos, F., and Sammonds, P.: Superstatistical view of stress-induced electric current fluctuations in rocks, *Physica A*, 414, 368–377, 2014.



- 1 Carvajal, M., Cisternas, M. and Catalán, P.A.: Source of the 1730 Chilean earthquake from historical  
2 records: Implications for the future tsunami hazard on the coast of Metropolitan Chile, *J. Geophys. Res.*  
3 *Solid Earth*, 122, 3648–3660, doi:10.1002/2017JB014063, 2017.
- 4
- 5 Casotto, S. and Biscani, F.: A fully analytical approach to the harmonic development of the tide-generating  
6 potential accounting for precession, nutation, and perturbations due to figure and planetary terms. *AAS*  
7 *Division on Dynamical Astronomy*, April 2004, vol. 36(2), 67, 2004.
- 8
- 9 Chernogor, L.F.: Possible Generation of Quasi-Periodic Magnetic Precursors of Earthquakes. *Geomagn.*  
10 *Aeron.* 59, 374–382 (2019), doi: 10.1134/S001679321903006X, 2019.
- 11
- 12 Chulliat, A., Lalanne, X., Gaya-Pique, L.R., Truong, F. and Savary, J.: The new Easter Island magnetic  
13 observatory. *Proceedings of the XIIIth IAGA Workshop on Geomagnetic Observatory Instruments, Data*  
14 *Acquisition and Processing*, edited by J. J. Love, 271 pp., U.S. Geological Survey Open-File Report 2009-  
15 1226, 2009.
- 16
- 17 Contoyiannis, Y., Potirakis, S.M., Eftaxias, K., Hayakawa, M., Schekotov, A.: Intermittent criticality  
18 revealed in ULF magnetic fields prior to the 11 March 2011 Tohoku earthquake (Mw = 9). *Physica A* 452,  
19 19–28, doi: 10.1016/j.physa.2016.01.065, 2016.
- 20
- 21 Cordaro, E.G., Olivares, E., Gálvez, D., Salazar-Aravena, D., Laroze, D.: New <sup>3</sup>He neutron monitor for  
22 Chilean osmic-ray observatories from the Altiplanic Zone to the Antarctic zone. *Adv. Space Res.* 49, 1670,  
23 doi: 10.1016/j.asr.2012.03.015, 2012.
- 24
- 25 Cordaro, E.G., Gálvez, D. and Laroze, D.: Observation of intensity of cosmic rays and daily magnetic shifts  
26 near meridian 70° in the South America. *Journal of Atmospheric and Solar-Terrestrial Physics*. Volume  
27 142, May 2016, Pages 72–82. doi: 10.1016/j.jastp.2016.02.015, 2016.
- 28
- 29 Cordaro, E.G., Venegas, P. and Laroze, D.: Latitudinal variation Rate of Geomagnetic Cutoff Rigidity in  
30 the active Chilean convergent margin. *Annales Geophysicae* Angeo-2017-176. 2018, doi: 10.5194/angeo-  
31 36-275-2018, 2018.
- 32
- 33 Cordaro, E.G., Venegas-Aravena, P. and Laroze, D.: Variation of geomagnetic cutoff rigidity in the  
34 southern hemisphere close to 70°W (South-Atlantic Anomaly and Antarctic zones) in the period 1975-  
35 2010, *Advances in Space Research*, <https://doi.org/10.1016/j.asr.2018.12.019>, 2019.
- 36
- 37 De Santis, A., De Franceschi, G., Spogli, L., Perrone, L., Alfonsi, L., Qamili, E., Cianchini, G., Di  
38 Giovambattista, R., Salvi, S., Filippi, E., Pavón-Carrasco, F.J., Monna, S., Piscini, A., Battiston, R., Vitale,  
39 V., Picozza, P.G., Conti, L., Parrot, M., Pinçon, J.-L., Balasis, G., Tavani, M., Argan, A., Piano, G.,  
40 Rainone, M.L., Liu, W. and Tao, D.: Geospace perturbations induced by the Earth: The state of the art and  
41 future trends. *Physics and Chemistry of the Earth, Parts A/B/C*, Vol. 85–86, Pages 17–33, doi:  
42 10.1016/j.pce.2015.05.004, 2015.
- 43
- 44 De Santis, A., Balasis, G., Pavón-Carrasco, F.J., Cianchini G. and Manda M.: Potential earthquake  
45 precursory pattern from space: The 2015 Nepal event as seen by magnetic Swarm satellites. *Earth and*  
46 *Planetary Science Letters* 461 (2017) 119–126. <http://dx.doi.org/10.1016/j.epsl.2016.12.037>, 2017.
- 47
- 48 De Santis, A., Marchetti, D., Spogli, L., Cianchini, G., Pavón-Carrasco, F.J., De Franceschi, G., Di  
49 Giovambattista, R., Perrone, L., Qamili, E., Cesaroni, C., De Santis, A., Ippolito, A., Piscini, A.,  
50 Campuzano, S.A., Sabbagh, D., Amoroso, L., Carbone, M., Santoro, F., Abbattista, C. and Drimaco, D.:  
51 Magnetic Field and Electron Density Data Analysis from Swarm Satellites Searching for Ionospheric  
52 Effects by Great Earthquakes: 12 Case Studies from 2014 to 2016. *Atmosphere* 2019 ,10, 371; doi:  
53 10.3390/atmos10070371, 2019.
- 54
- 55 Diego, P., Storini, M., Parisi, M. and Cordaro, E.: AE index variability during corotating fast solar wind  
56 streams. *J. Geophys. Res.* 110, doi:10.1029/2004JA010715, 2005.
- 57
- 58 Dobrovolsky, I.R., Zubkov, S.I. and Myachkin, V.I.: Estimation of the size of earthquake preparation zones.  
59 *Pure Appl. Geophys.* 117, 1025–1044, doi: 10.1007/BF00876083, 1979.
- 60



- 1
- 2 Fenoglio, M. A., Johnston, M. J. S., and Byedee, J.: Magnetic and electric fields associated with changes
- 3 in high pore pressure in fault zones: application to the Loma Prieta ULF emissions, *J. Geophys. Res.*, 100,
- 4 12951–12958, 1995.
- 5
- 6 Finlay, C.: Magnetohydrodynamics Waves, *Encyclopedia of Geomagnetism and Paleomagnetism*, Edited
- 7 by D. Gubbins and E. Herrero-Berbera. Springer, Netherlands, 2007.
- 8
- 9 Florios, K., Contopoulos, I., Christofilakis, V., Tatsis, G., Chronopoulos, S., Repapis, C. and Tritakis, V.:
- 10 Pre-seismic Electromagnetic Perturbations in Two Earthquakes in Northern Greece. *Pure Appl. Geophys.*
- 11 177, 787–799 (2020). <https://doi.org/10.1007/s00024-019-02362-6>, 2020.
- 12
- 13 Fraser-Smith, A.C.: Ultralow-frequency magnetic fields preceding large earthquakes, *Eos Trans.*, 2008,
- 14 vol. 89, no. 23, p. 211, doi: 10.1029/2008EO230007, 2008.
- 15
- 16 Freund, F.: Toward a unified solid-state theory for pre-earthquake signals, *Acta Geophys.*, 58, 719–766,
- 17 2010.
- 18
- 19 Geller, R.J.: Earthquake prediction: a critical review. *Geophysical Journal International*, Volume 131, Issue
- 20 3, December 1997, Pages 425–450, doi: 10.1111/j.1365-246X.1997.tb06588.x, 1997.
- 21
- 22 Gjerloev, J. W.: The SuperMAG data processing technique, *J. Geophys. Res.*, 117 A09213, doi:
- 23 10.1029/2012JA017683, 2012.
- 24
- 24 Gubbins, D., Jones, A.L. and Finlay, C.C.: Fall in Earth’s magnetic field is erratic. *Science* 312: 900–902,
- 25 doi: 10.1126/science.1124855, 2006.
- 26
- 26 Hayakawa, M. and Molchanov, O.A. (eds.): *Seismo Electromagnetics: Lithosphere-Atmosphere-*
- 27 *Ionosphere Coupling*. TERRAPUB, Tokyo, 2002.
- 28
- 28 Hayakawa, M., Schekotov, A., Potirakis, S., Eftaxias, K.: Criticality features in ULF magnetic fields prior
- 29 to the 2011 Tohoku earthquake. *Proc. Jpn. Acad. Ser. B, Phys. Biol. Sci.* 91, 25–30, doi:
- 30 10.2183/pjab.91.25, 2015.
- 31
- 31 Heirtzler, J.: The future of the South Atlantic Anomaly and implications for radiation damage in space.
- 32 *Journal of Atmospheric and Solar Terrestrial Physics* 64: 1701–1708, doi: 10.1016/S1364-6826(02)00120-
- 33 7, 2002.
- 34
- 34 Herbst, K., Kopp, A., Heber, B.: Influence of the terrestrial magnetic field geometry on the Cutoff Rigidity
- 35 of cosmic ray particles. *Ann. Geophys.* 31, 1637–1643, doi: 10.5194/angeo-31-1637-2013, 2013.
- 36
- 36 Herman, M.W., Furlong, K.P., Hayes, G.P. and Benz, H.M.: Foreshock triggering of the 1 April 2014 Mw
- 37 8.2 Iquique, Chile, earthquake, *Earth and Planetary Science Letters*, Volume 447, 1 August 2016, Pages
- 38 119–129, doi: 10.1016/j.epsl.2016.04.020, 2016.
- 39
- 39 Hitchmn, A.P., Lilley, F.E.M. and Campbell, W.H.: The quiet daily variation in the total magnetic field:
- 40 global curves. *Geophysical Research Letters*, VOL. 25, NO. 11, p2007–2010, June 1, 1998, doi:
- 41 10.1029/98GL51332, 1998.
- 42
- 42 Ippolito, A., Perrone, L., De Santis, A. and Sabbagh D.: Ionosonde Data Analysis in Relation to the 2016
- 43 Central Italian Earthquakes. *Geosciences* 2020, 10, 354; doi:10.3390/geosciences10090354, 2020.
- 44
- 44 Jordan, T., Chen, Y., Gasparini, P., Madariaga, R., Main, I., Marzocchi, W., Papadopoulos, G., Sobolev,
- 45 G., Yamaoka, K. and Zschau, J.: Operational earthquake forecasting. *State of Knowledge and Guidelines*
- 46 *for Utilization. Annals of Geophysics*, 54(4), doi: 10.4401/ag-5350, 2011.
- 47
- 47 Kanamori, H.: The Energy Release in Great Earthquakes, *J. Geophys. Res.*, 82(20), 2981–2987, 1977.
- 48
- 48
- 49
- 50



- 1 Karakeliana, D., Klemperera, S. L., Fraser-Smith, A. C., and Thompson, G. A.: Ultra-low frequency  
2 electromagnetic measurements associated with the 1998 Mw 5.1 San Juan Bautista, California earthquake  
3 and implications for mechanisms of electromagnetic earthquake precursors, *Tectonophysics*, 359, 65–79,  
4 2002.
- 5
- 6 Kivelson, M. G. and Russell, C.T.: *Introduction to Space Physics*. Cambridge, Cambridge University Press,  
7 doi: 10.1017/9781139878296, 1995.
- 8
- 9 Kulsrud, R.: *Plasma Physics for Astrophysics*. Princeton University Press, U.S.A. Lanza, R., Meloni, A.,  
10 2006. *The Earth's Magnetism – An Introduction for Geologists*. Springer, Würzburg.
- 11
- 12 Lassak, T., McNamara, A., Garnero, E., and Zhong, S.: Core–mantle boundary topography as a possible  
13 constraint on lower mantle chemistry and dynamics. *Earth and Planetary Science Letters*, Vol. 289, Issues  
14 1–2, 15 January 2010, Pages 232–241, doi: 10.1016/j.epsl.2009.11.012, 2010.
- 15
- 16 Lazarian, A., Eyink, G.L., Jafari, A., Kowal, G., Li, H., Xu, S. and Vishniac, E.T.: 3D turbulent  
17 reconnection: Theory, tests, and astrophysical implications. *Physics of Plasmas* 27, 012305 (2020);  
18 <https://doi.org/10.1063/1.5110603>, 2020.
- 19
- 20 Li, Z., Zhang, X., Wei, Y. and Ali, M.: Experimental Study of Electric Potential Response Characteristics  
21 of Different Lithological Samples Subject to Uniaxial Loading. *Rock Mech Rock Eng* (2020).  
22 <https://doi.org/10.1007/s00603-020-02276-z>, 2020.
- 23
- 24 Liu, J.Y.: Earthquake precursors observed in the ionospheric F-region. In *Electromagnetic Phenomena*  
25 *Associated with Earthquakes* (ed. Hayakawa, M.). Transworld Research Network, Trivandrum, India, pp.  
26 187–204, 2009.
- 27
- 28 Ma, L., Zhao, J., and Ni, B.: A Zener-Stroh crack interacting with an edge dislocation, *Theoretical and*  
29 *Applied Mechanics Letters*, 2, 021003, <https://doi.org/10.1063/2.1102103>, 2011.
- 30
- 31 Marchetti, D. and Akhoondzadeh, M.: Analysis of Swarm satellites data showing seismo-ionospheric  
32 anomalies around the time of the strong Mexico (Mw = 8.2) earthquake of 08 September 2017. *Advances*  
33 *in Space Research*, Vol. 62, Issue 3, 1 August 2018, Pages 614–623, doi: 10.1016/j.asr.2018.04.043, 2018.
- 34
- 35 Marchetti, D., De Santis, A., D'Arcangelo, S., Poggio, F., Piscini, A., Campuzano, S.A. and De Carvalho,  
36 W.V.J.O.: Pre-earthquake chain processes detected from ground to satellite altitude in preparation of the  
37 2016–2017 seismic sequence in Central Italy. *Remote Sensing of Environment*. Volume 229, August 2019,  
38 Pages 93–99, doi: 10.1016/j.rse.2019.04.033, 2019a.
- 39
- 40 Marchetti, D., Santis, A. D., Shen, X., Campuzano, S. A., Perrone, L., Piscini, A., Di Giovambattista, R.,  
41 Jin, S., Ippolito, A., Cianchini, G., Cesaroni C., Sabbagh, D., Spogli, L., Zhima, Z. and Huang, J.: Possible  
42 Lithosphere-Atmosphere-Ionosphere Coupling effects prior to the 2018 Mw=7.5 Indonesia earthquake  
43 from seismic, atmospheric and ionospheric data. *Journal of Asian Earth Sciences*, 104097. doi:  
44 10.1016/j.jseaes.2019.104097, 2019b.
- 45
- 46 McFadden, P.L. and Merrill, R.T.: *Geomagnetic Field, Asymmetries*, *Encyclopedia of Geomagnetism and*  
47 *Paleomagnetism*, Edited by D. Gubbins and E. Herrero-Berbera. Springer, Netherlands, 2007.
- 48
- 49 Molchanov, O.A. and Hayakawa, M.: *SeismoElectromagnetics and Related Phenomena: History and Latest*  
50 *Results*. TERRAPUB, Tokyo, 2008.
- 51
- 52 Moldwin, M.: *An introduction to space weather*. Cambridge University Press. doi:  
53 10.1017/CBO9780511801365, 2008.
- 54
- 55 Oikonomou, C., Haralambous, H. and Muslim, B.: Investigation of ionospheric precursors related to deep  
56 and intermediate earthquakes based on spectral and statistical analysis. *Advances in Space Research* 59  
57 (2017) 587–602 doi: 10.1016/j.asr.2016.10.026, 2017.
- 58



- 1 Olson, P., Christensen, U.R. and Glatzmaier, G.A.: Numerical modeling of the geodynamo: mechanisms  
2 of field generation and equilibration, *J. geophys. Res.*, 104, 10 383–10 404, doi: 10.1029/1999JB900013,  
3 1999.  
4  
5 Olson, P.: *Core Dynamics: An Introduction and Overview*, Treatise on Geophysics (Second Edition) 2015,  
6 Pages 1–25 Reference Module in Earth Systems and Environmental Sciences Volume 8: Core Dynamics  
7 doi:10.1016/B978-0-444-53802-4.00137-8, 2015.  
8  
9 Oppenheim, A.V., Schaffer, R.W., and Buck, J. R.: *Discrete-Time Signal Processing*. 2nd Ed. Upper Saddle  
10 River, NJ: Prentice Hall, 1999.  
11  
12 Park, J., Song, T.-R. A., Tromp, J., Okal, E., Stein, S., Roult, G., Clevede, E., Laske, G., Kanamori, H.,  
13 Davis, P., Berger, J., Braitenberg, C., Van Camp, M., Lei, X., Sun, H., Xu, H. and Rosat, S.: Earth's Free  
14 Oscillations Excited by the 26 December 2004 Sumatra-Andaman Earthquake. *Science* 20 May 2005: Vol.  
15 308, Issue 5725, pp. 1139–1144. DOI: 10.1126/science.1112305, 2005.  
16  
17 Pedrera, A., Galindo-Zaldívar, J., Ruiz-Constán, A., Bohoyo, F., Torres-Carbonell, P., Ruano, P., Maestro,  
18 A. and González-Castillo, L.: The last major earthquakes along the Magallanes-Fagnano fault system  
19 recorded by disturbed trees (Tierra del Fuego, South America). *Terra Nova* 26, 448–453, doi:  
20 10.1111/ter.12119 2014.  
21  
22 Pomerantz, M.A.: *Cosmic Rays*. Published by The Commission on College Physics. Rd. Van Nostrand  
23 Reinhold Company, 1971.  
24  
25 Potirakis, S., Eftaxias, K., Schekotov, A., Yamaguchi, H. and Hayakawa, M.: Criticality features in ultra-  
26 low frequency magnetic fields prior to the 2013 M6.3 Kobe earthquake. *Ann. Geophys.* Vol. 59, No 3, doi:  
27 10.4401/ag-6863, 2016.  
28  
29 Potirakis, S.M., Asano, T. and Hayakawa, M.: Criticality Analysis of the Lower Ionosphere Perturbations  
30 Prior to the 2016 Kumamoto (Japan) Earthquakes as Based on VLF Electromagnetic Wave Propagation  
31 Data Observed at Multiple Stations. *Entropy* 2018, 20, 199; doi: 10.3390/e20030199, 2018.  
32  
33 Priest, E.R., Forbes, T.: *Magnetic Reconnection: Mhd Theory and Applications*, Cambridge University  
34 Press, New York, 2000.  
35  
36 Prutkin, I.: Gravitational and magnetic models of the core–mantle boundary and their correlation. *Journal*  
37 *of Geodynamics*, Vol 45, Issues 2–3, March 2008, Pages 146–153, doi: 10.1016/j.jog.2007.09.001, 2008.  
38  
39 Pulinet, S. and Boyarchuk, K.: *Ionospheric Precursors of Earthquakes*. Springer, Berlin, doi:  
40 10.1007/b137616, 2004.  
41  
42 Rabiner, L.R. and Schaffer, R.W.: Digital Processing of Speech Signals. *The Journal of the Acoustical*  
43 *Society of America* 67, 1406 (1980); doi: 10.1121/1.384160, 1980.  
44  
45 Russel, C.T., Zhou, X.W., Chi, P.J., Kawano, H., Moore, T.E., Peterson, W.K., Cladis, J.B. and Singer,  
46 H.J.: Sudden compression of the outer magnetosphere associated with an ionospheric mass ejection.  
47 *Geophys. Res. Lett.* 26,2343, doi:10.1029/1999GL900455, 1999.  
48  
49 Sarson, G.R.: *Dynamo Waves*, Encyclopedia of Geomagnetism and Paleomagnetism, Edited by D. Gubbins  
50 and E. Herrero-Berbera. Springer, Netherlands, 2007.  
51  
52 Satake, K., Heidarzadeh, M., Quiroz, M. and Cienfuegos, R.: History and features of trans-oceanic tsunamis  
53 and implications for paleo-tsunami studies. *Earth-Science Reviews*, Volume 202, March 2020, 103112,  
54 doi: 10.1016/j.earscirev.2020.103112, 2020.  
55  
56 Scoville, J., Heraud, J. and Freund, F.: Pre-earthquake magnetic pulses. *Nat. Hazards Earth Syst. Sci.*, 15,  
57 1873–1880, 2015. doi:10.5194/nhess-15-1873-2015, 2015.  
58  
59 Hough, S. E.: *Predicting the Unpredictable: The Tumultuous Science of Earthquake Prediction*, Vol. 272,  
60 Princeton: Princeton University Press. doi: 10.1515/9781400883547, 2010.





- 1  
2 Shea, M.A. and Smart, D.F.: Vertical cutoff rigidities for cosmic ray stations since 1955. Proc. 27th Int.  
3 Cosmic Ray Conf., Hamburg, 10, 4063–4066, 2001.  
4  
5 Siebert, M. and Meyer, J.: Geomagnetic activity indices. In: Dieminger W, Hartman GK, and Leitinger R  
6 (eds.) The Upper Atmosphere, pp. 887–911. Berlin Heidelberg/New York: Springer, 1996.  
7  
8 Silva, R. P., Sobral, J. H. A., Koga, D., and Souza, J. R.: Evidence of prompt penetration electric fields  
9 during HILDCAA events, Ann. Geophys., 35, 1165–1176, <https://doi.org/10.5194/angeo-35-1165-2017>,  
10 2017.  
11  
12 Simmons, N.A., Forte, A.M., Boschi, L. and Grand, S.P.: Gypsum: A joint tomographic model of mantle  
13 density and seismic wave speeds. Journal of Geophysical Research (2010) 115: B12310.  
14 <http://dx.doi.org/10.1029/2010JB007631>, 2010.  
15  
16 Smart, D.F., Shea, M.A., Flückiger, E.O.: Magnetospheric models and trajectory computations. Space Sci.  
17 Rev. 93 (1), 305–333 2000.  
18  
19 Smart, D.F., Shea, M.A.: Geomagnetic Cutoff Rigidity computer program Theory, Software Description  
20 and Example. Final Report, Grant NAG5-8009. Center for Space Plasmas and Aeronomc Research, the  
21 University of Alabama in Huntsville, 2001.  
22  
23 Smart, D.F. and Shea, M.A.: A review of geomagnetic cutoff rigidities for earth-orbiting spacecraft.  
24 *Advances in Space Research* 36 (2005) pp. 2012–2020. doi: 10.1016/j.asr.2004.09.015, 2005.  
25  
26 Soldati, G., Boschi, L., and Forte, A.M.: Tomography of core–mantle boundary and lowermost mantle  
27 coupled by geodynamics. Geophysical Journal International (2012) 189: 730–746, doi: 10.1111/j.1365-  
28 246X.2012.05413.x, 2012.  
29  
30 Soloviev, A., Chulliat, A., Bogoutdinov, S., Gvishiani, A., Agayan, S., Peltier, A. and Heumez, B.:  
31 Automated recognition of spikes in 1 Hz data recorded at the Easter Island magnetic observatory. Earth  
32 Planets Space, 64, 743–752, doi: 10.5047/eps.2012.03.004, 2012.  
33  
34  
35 Stewart, D.N., Busse, F.H., Whaler, K. and Gubbins, D.: Geomagnetism Earth rotation and the electrical  
36 conductivity of the lower mantle. Phys. Earth Planet. Inter., 92, 199–214), doi: 10.1016/0031-  
37 9201(95)03035-4, 1995.  
38  
39 Storini, M., Shea, M.A., Smart, D.F. and Cordaro, E.G.: Cutoff Variability for the Antarctic Laboratory for  
40 Cosmic Rays (LARC: 1955-1995). 26<sup>th</sup> International Cosmic Ray Conference. SH.3.6.30 .7 1999. 402,  
41 1999.  
42  
43 Stavrakas, I., Triantis, D., Agioutantis, Z., Maurigiannakis, S., Saltas, V., Vallianatos, F., and Clarke, M.:  
44 Pressure stimulated currents in rocks and their correlation with mechanical properties, Nat. Hazards Earth  
45 Syst. Sci., 4, 563–567, <https://doi.org/10.5194/nhess-4-563-2004>, 2004.  
46  
47 Stavrakas, I., Kourkoulis, S., and Triantis, D.: Damage evolution in marble under uniaxial compression  
48 monitored by Pressure Stimulated Currents and Acoustic Emissions. Frattura Ed Integrità Strutturale,  
49 13(50), 573–583. <https://doi.org/10.3221/IGF-ESIS.50.48>, 2019.  
50  
51 Tarduno, J.A., Watkeys, M.K., Huffman, T.N., Cottrell, R.D., Blackman, E.G., Wendt, A., Scribner, C.A.  
52 and Wagner, C.L.: Antiquity of the South Atlantic Anomaly and evidence for top-down control on the  
53 geodynamo. Nat Commun 6, 7865, doi:10.1038/ncomms8865, 2015.  
54  
55  
56 Torrence, C. and Compo, G.P.: A Practical Guide to Wavelet Analysis. Bulletin of the American  
57 Meteorological Society, vol. 79, Issue 1, pp.61–78, doi: 10.1175/1520-  
58 0477(1998)079<0061:APGTWA>2.0.CO;2, 1998.  
59



- 1 Triantis, D., Anastasiadis, C. and Stavrakas, I.: The correlation of electrical charge with strain on stressed  
2 rock samples, *Nat. Hazards Earth Syst. Sci.*, 8, 1243–1248, <https://doi.org/10.5194/nhess-8-1243-2008>,  
3 2008.  
4  
5 Tsyganenko, N.A.: A model of the near magnetosphere with a dawn-dusk asymmetry 1. Mathematical  
6 structure. *J. Geophys. Res.* 107 (A8), 1179, doi: 10.1029/2001JA000219, SMP12-1-17, 2002a.  
7  
8 Tsyganenko, N.A.: A model of the near magnetosphere with a dawn-dusk asymmetry 2: parametrization  
9 and fitting to observation. *J. Geophys. Res.* 107 (A8), 1176, doi:10.1029/2001JA000219, 2002b.  
10  
11 Tzanis, A. and Vallianatos, F.: A physical model of electrical earthquake precursors due to crack  
12 propagation and the motion of charged edge dislocations. *Seismo Electromagnetics (Lithosphere–*  
13 *Atmosphere–Ionosphere–Coupling)*, TerraPub, 2002, pp. 117–130, 2002.  
14  
15  
16 Utda, H., Shimizu, H., Ogawa, T., Maeda, T., Furumura, T., Yamamoto, T., Yamazaki, N., Yoshitake, Y.,  
17 and Nagamachi, S.: Geomagnetic field changes in response to the 2011 off the Pacific Coast of Tohoku  
18 earthquake and tsunami, *Earth Planet. Sc. Lett.*, 311, 11–27, <https://doi.org/10.1016/j.epsl.2011.09.036>,  
19 2011.  
20  
21 Vallianatos, F. and Tzanis, A.: On the nature, scaling and spectral properties of pre-seismic ULF signals.  
22 *Natural Hazards and Earth System Sciences* (2003) 3: 237–242. European Geosciences Union, doi:  
23 10.5194/nhess-3-237-2003, 2003.  
24  
25 Varotsos, P., Eftaxias, K., Lazaridou, M., Antonopoulos, G., Makris, J. and Poliyiannakis, J.: Summary of  
26 the five principles suggested by Varotsos et al. [1996] and the additional questions raised in this debate.  
27 *Geophysical Research Letter*. Volume 23, Issue 11, 27 May 1996, p1449-1452, doi: 10.1029/96GL01437,  
28 1996.  
29  
30 Varotsos, P.A.: The Physics of Seismic Electric Signals. *Journal of atmospheric electricity*, 33(1), 53-68,  
31 TERRAPUB, Tokyo, 2005.  
32  
33 Venegas-Aravena, P., Cordaro E.G. and Laroze, D.: A review and upgrade of the lithospheric dynamics in  
34 context of the seismo-electromagnetic theory. *Natural Hazards Earth System Sciences*. 119, 1- 13, doi:  
35 10.5194/nhess- 19-1-2019, 2019.  
36  
37 Venegas-Aravena, P., Cordaro E.G. and Laroze, D.: The spatial–temporal total friction coefficient of the  
38 fault viewed from the perspective of seismo-electromagnetic theory. *Nat. Hazards Earth Syst. Sci.*, 20,  
39 1485–1496, doi: 10.5194/nhess-20-1485-2020, 2020.  
40  
41 Vezzoli, L. and Acoocella, V.: Easter Island, SE Pacific: An end-member type of hotspot volcanism.  
42 *Geological Society of American Bulletin*, May/june 2009, V. 121; no 5/6, p 869-886,  
43 doi:10.1130/B26470.1, 2009.  
44  
45 Vigny, C., Socquet, A., Peyrat, S., Ruegg, J.-C., Metois, M., Madariaga, R., Morvan, S., Lancieri, M.,  
46 Lacassin, R., Campos, J., Carrizo, D., Bejar-Pizarro, M., Barrientos, S., Armijo, R., Aranda, C., Valderas-  
47 Bermejo, M.-C., Ortega, I., Bondoux, F., Baize, S., Lyon-Caen, H., Pavez, A., Vilotte, J. P., Bevis, M.,  
48 Brooks, B., Smalley, R., Parra, H., Baez, J.-C., Blanco, M., Cimbaro, S., and Kendrick, E.: The 2010 Mw  
49 8.8 Maule Megathrust Earthquake of Central Chile, monitored by GPS, *Science*, 332,  
50 1417–1421, 2011.  
51  
52 Villalobos, C.U., Bravo, M.A., Ovalle, E.M. and Foppiano, A.J.: Ionospheric characteristics prior to the  
53 greatest earthquake in recorded history. *Advances in Space Research*, 57 (2016) 1345–1359, doi:  
54 10.1016/j.asr.2015.09.015, 2016.  
55  
56 Vogel, E. E., Brevis, F. G., Pastén, D., Muñoz, V., Miranda, R. A., and Chian, A. C.-L.: Measuring the  
57 seismic risk along the Nazca–South American subduction front: Shannon entropy and mutability, *Nat.*  
58 *Hazards Earth Syst. Sci.*, 20, 2943–2960, <https://doi.org/10.5194/nhess-20-2943-2020>, 2020.  
59

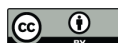

- 1 Yamanaka, C., Matsumoto, H. and Asahara, H.: Preseismic Electromagnetic Phenomena. IEEJ
- 2 Transactions on Fundamentals and Materials. Special Issue Paper, 2016 Volume 136 Issue 5 Pages 310-
- 3 314, doi: 10.1541/ieejfms.136.310, 2016.
- 4
- 5 Yeeram, T.: The solar wind-magnetosphere coupling and daytime disturbance electric fields in equatorial
- 6 ionosphere during consecutive recurrent geomagnetic storms. Journal of Atmospheric and Solar-Terrestrial
- 7 Physics, Volume 187, June 2019, Pages 40-52, doi: 10.1016/j.jastp.2019.03.004, 2019.
- 8
- 9 Yoshida, M.: Core-mantle boundary topography estimated from numerical simulations of instantaneous
- 10 mantle flow. Geochemistry, Geophysics, Geosystems, Vol. 9, No. 7, 2 July 2008, doi:
- 11 10.1029/2008GC002008, 2008.
- 12
- 13 Zhang, Y., Zhang, G., Hetland, E.A., Shan, X., Wen, S. and Zuo, R.: Coseismic Fault Slip of the September
- 14 16, 2015 Mw 8.3 Illapel, Chile Earthquake Estimated from InSAR Data. In: Braitenberg C., Rabinovich A.
- 15 (eds) The Chile-2015 (Illapel) Earthquake and Tsunami. Pageoph Topical Volumes. Birkhäuser, Cham,
- 16 doi: 10.1007/978-3-319-57822-4\_7, 2017.

# Figure Captions

**Figure 1:** Left side: Latitudinal effect of the Geomagnetic cutoff rigidity projected over the Chilean convergent margin close to the 70° W meridian. The pink solid lines indicate the edges of tectonic plates. Nazca Plate from 18° North to 45° degrees latitudinal, The South American Continent on the South American Plate. The 45° to 79° the Antarctic Plate. The black lines indicate coast line. In blue the iso values of magnetic intensity due SAMA proximity. The symbols indicate stations location. Right: History of Chilean earthquakes.

**Figure 2:** The Kp magnetic activity index for the periods prior to the Maule 2010 (top), Iquique 2014 (middle) and Illapel 2015 (bottom) earthquakes. [spidr NOAA] [WDCFG Kyoto University] .

**Figure 3:** Vertical Component B<sub>z</sub> as a function of time at Putre and IPM stations. a) Maule 2010 at the Putre station, b) Iquique 2014 at the Putre station, c) Iquique 2014 at the Easter Island station and d) Illapel 2015 at Easter island station. Trends changes has been observed in the four cases.

**Figure 4:** a) Fast Fourier Transformation (FFT) of the second derivative B<sub>z</sub> component at Putre station for different events: Maule 2010 and Iquique 2014. The rise of frequencies in the range of micro Hz are compared to the FFT of the second derivative at IPM station for Illapel 2015. b) FFT every 15 days for Iquique 2015 at the Putre magnetometer. c) FFT every 8 days for Illapel 2015 at the Easter Island magnetometer.

**Figure 5:** Wavelet for B<sub>z</sub> at OSO station is shown. This graph is obtained by restricting the peaks considered in a band and daily average values during 2 years of measurements. Wavelet spectrum shows an increase prior and after Maule Earthquake. Unlike the spectrogram method where it is enough to consider the anomalous peaks on a threshold, wavelet analysis is more complex to calibrate than spectrogram analysis (upper limit).

**Figure 6:** Spectrograms analysis of vertical magnetic components after the external influence is filtered. a) The rise of a range of frequencies (1-2.5 mHz) appear prior and after the Maule 2010 earthquake (OSO station). The actives frequencies last less than 3 months. b) The rise of similar frequencies appears prior the Iquique 2014 earthquake in the vertical component of PIL station. This frequency activity las more than five months. c) The solar events were intense during September 2015. Nevertheless, it can be seen an increase in the spectrum since August 2015. This frequency activity last close to 3 months. Three earthquakes hit when exist the rise of ultra-low frequencies (mHz)

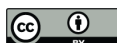

**Figure 7:** Accumulated magnetic anomalies of  $B_z$  and a lineal interpolation in the period during two years starting in 29 February 2009. The data were taken at OSO Station. Close to the Main earthquake, the linear trend breaks and the number of anomalies increase. Other important seismic events hit near the stations during the last period. Nevertheless, it is not clear that the anomaly increases are due these specific events.

**Figure 8:** Variation of the accumulated diary of magnetic anomalies of  $B_z$  during two years close to the three earthquakes: (a) Maule, (b) Iquique and (c) Illapel. The data were taken at OSO station (a) and PIL station (b & c), respectively. Is clear that the sigmoidal shape is similar in all of the earthquakes. This mean that these stations recorded a dramatic increase in the number of magnetic anomalies between 50 to 90 days prior each earthquake.

**Figure 9:** (Upper panel) Accumulated Diary of magnetic anomalies during two years, in component Y from Apr 1 to Oct 15, 2017 in Mexico Earthquake Sep 8, 2017 Mw8.2. (Lower panel) Residual behavior of Mexico Earthquake. The data is open source and were taken from swarm project (<ftp://swarm-diss.eo.esa.int/>). Methodology was developed by Marchetti and Akhoondzadeh (2018).

**Figure 10:** Schematic representation of the seimo-electromagnetic theory. The anomalies generation are owing the creation of several microcracks. The number of cracks increase because the internal collapse of the lithosphere when a non-constant uniaxial stress is applied.

## Table Captions

**Table 1:** The main characteristics for the detector of Chilean network Cosmic Rays and Geomagnetic Observatories as location, altitude, and atmospheric deep, type of detectors.

**Table 2:** The maximum radius where the ionosphere-lithosphere-atmosphere coupling may affect magnetic measurements to each earthquake studied at the station of Putre and IPM. (Dobrovolsky et al., 1979, Pulinets and Boyarchuk, 2004). The Preparation area or Dobrovolsky area is defined by the radius  $r = 10^{0.43M}$ , where M is the earthquake magnitude. This table shos that Putre and IPM stations are within the earthquake preparation stage for Maule, Iquique and Illapel.

## Figures

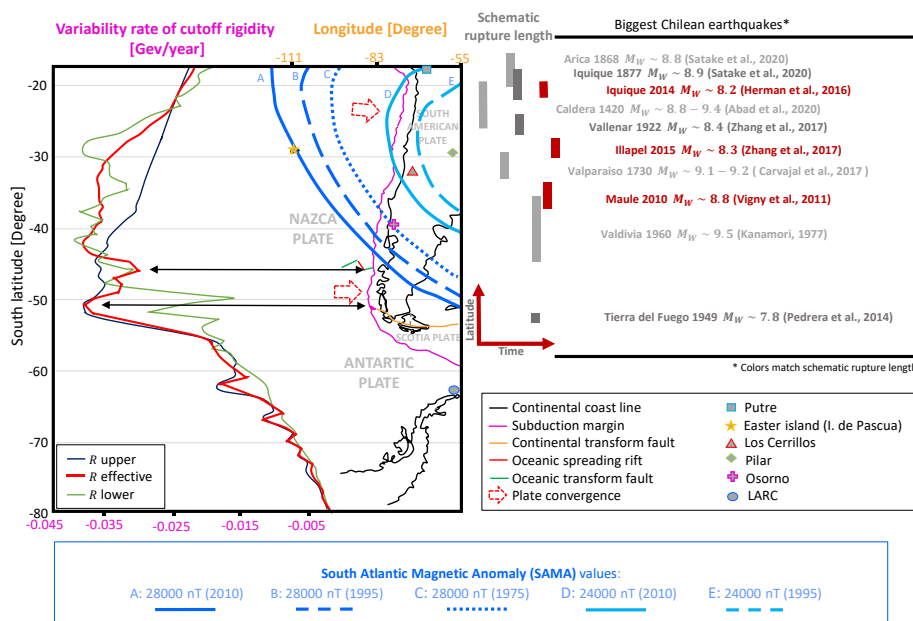

Figure 1



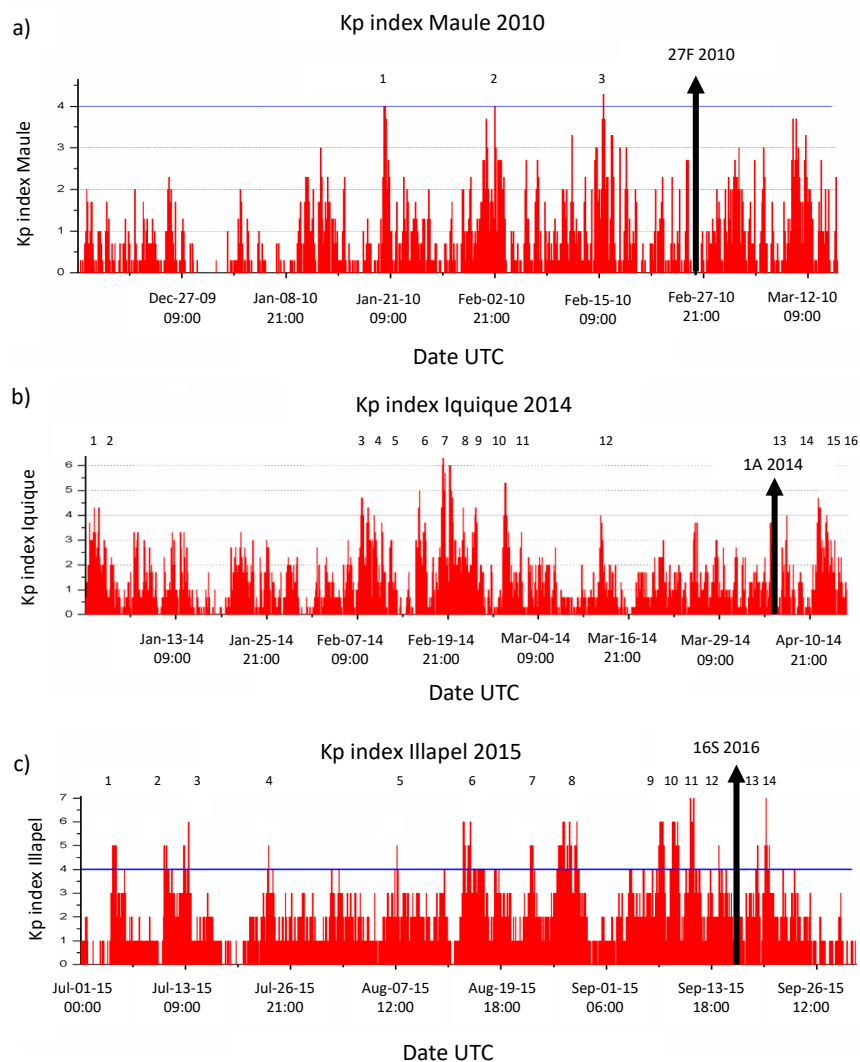

Figure 2 a,b,c

1  
2  
3  
4  
5

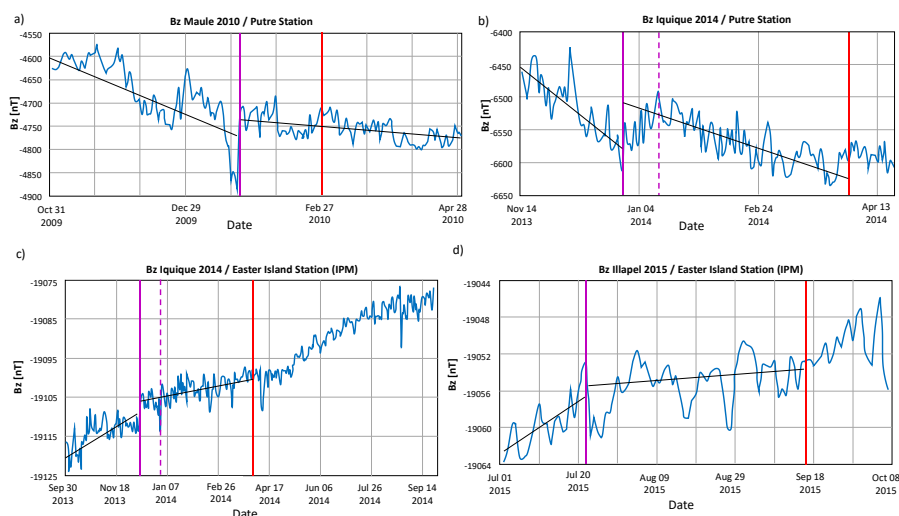

Figure 3 a, b, c, d

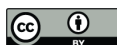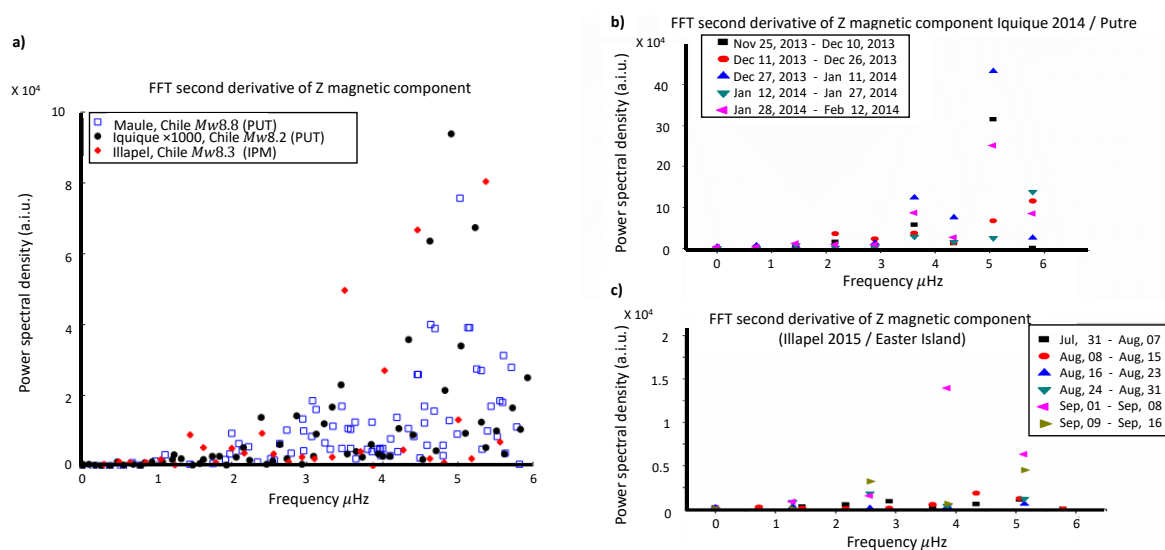

Figure 4 a,b,c

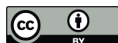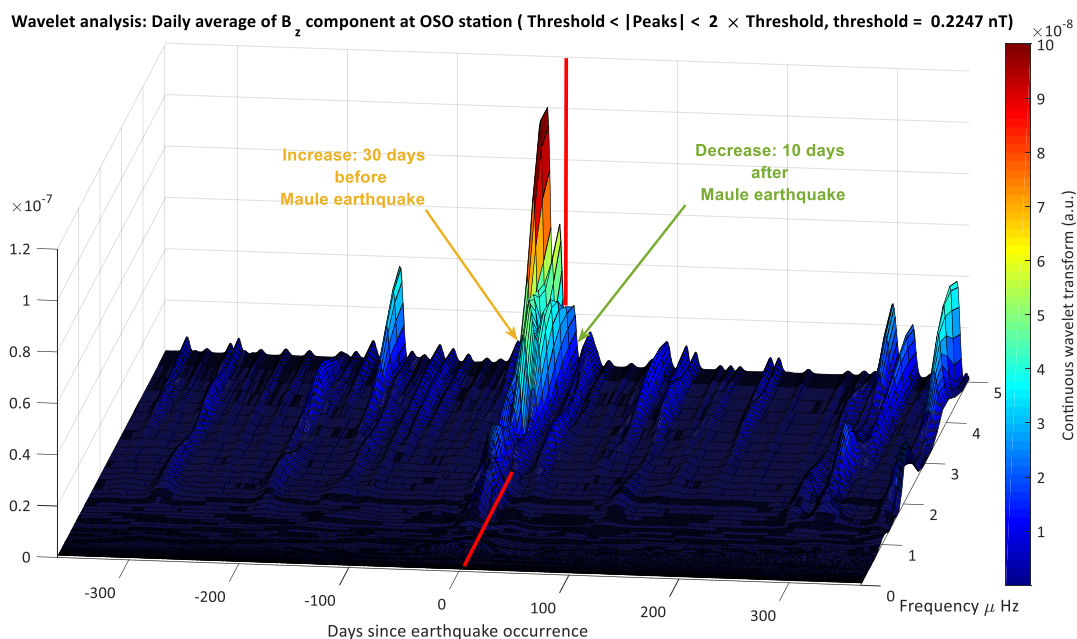

1

Figure 5



1

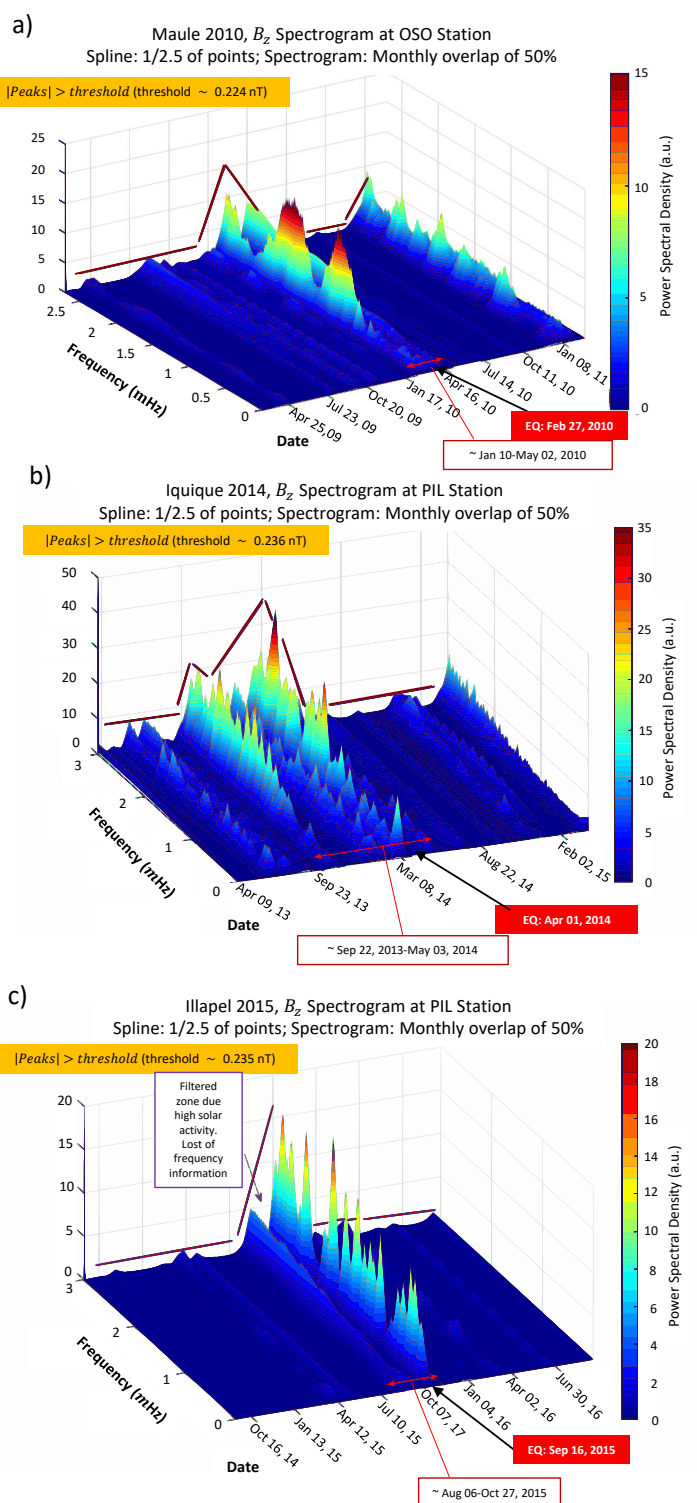





Figure 6

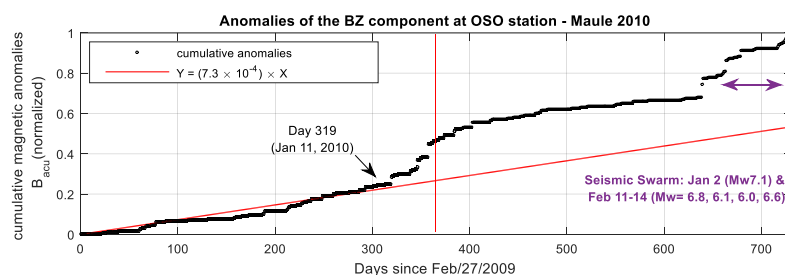

Figure 7

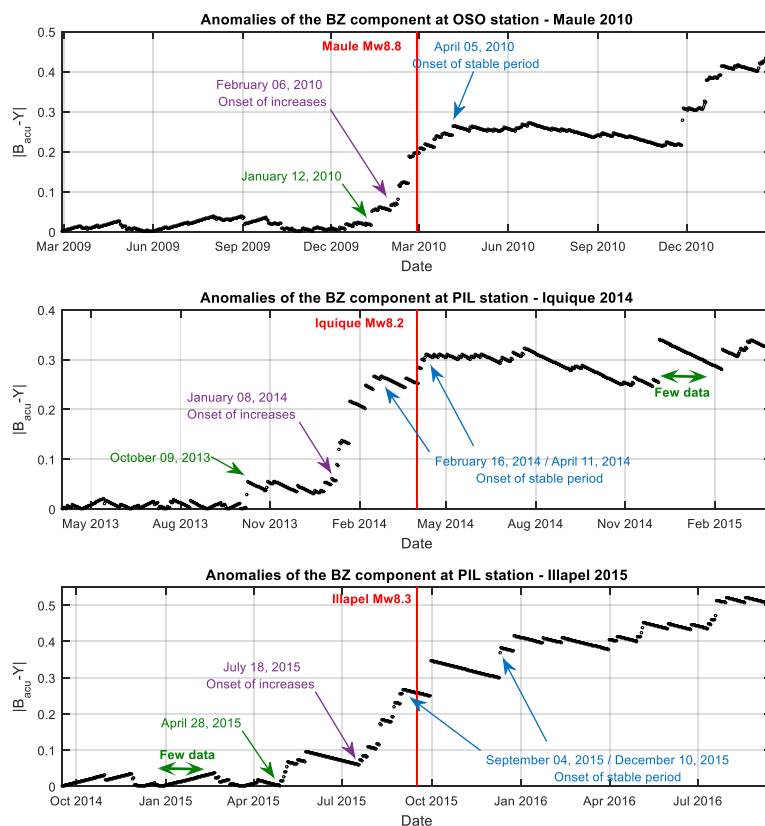

Figure 8

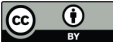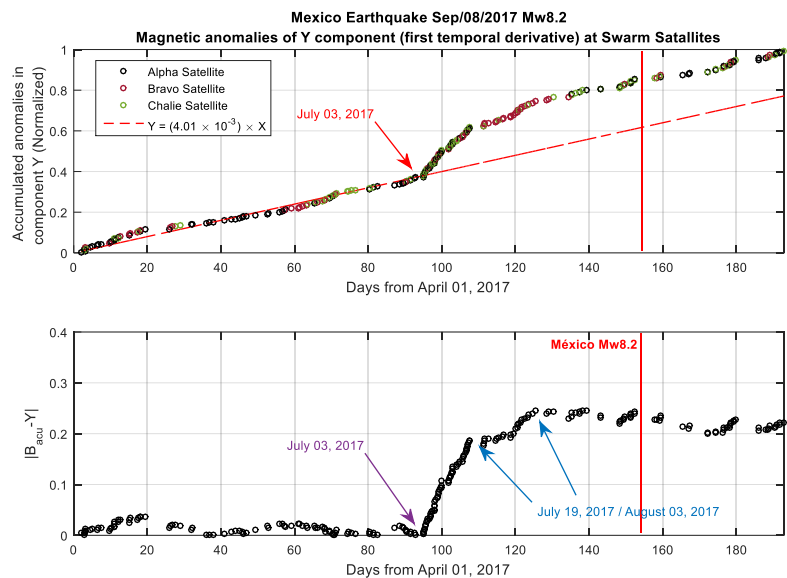

Figure 9

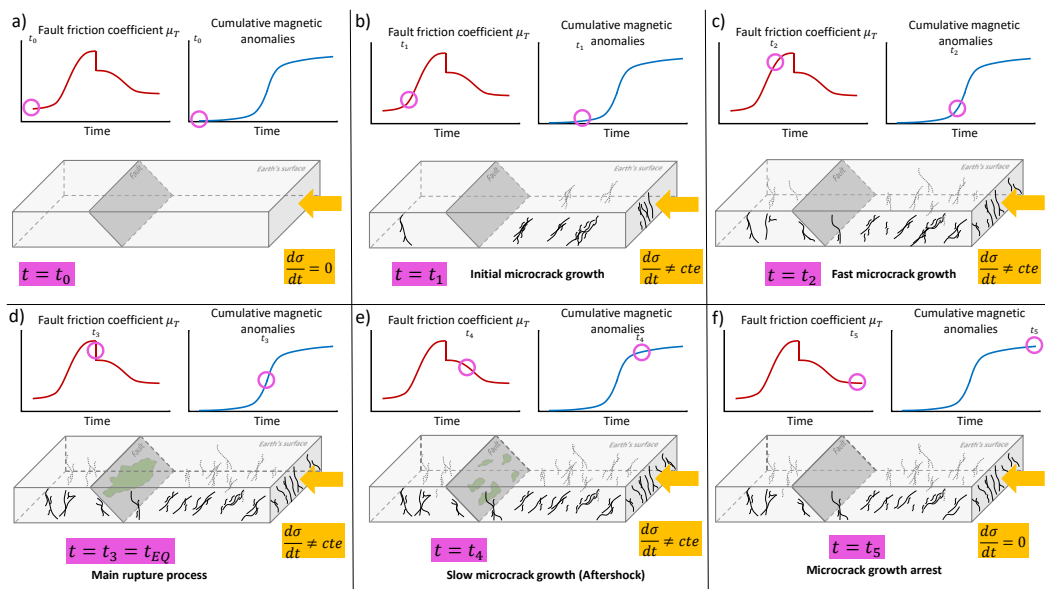

Figure 10



| Observatory         | Location                      | Geographical coordinate         | Altitude [m.a.s.l] | Atmospheric Deep [g/cm <sup>2</sup> ] | Instruments                                                                                                                                                                                                 | Time      |
|---------------------|-------------------------------|---------------------------------|--------------------|---------------------------------------|-------------------------------------------------------------------------------------------------------------------------------------------------------------------------------------------------------------|-----------|
| PUTRE (PUT)         | Andes Mountain, Chile         | 18°11'47.8" S.<br>69°33'10.9" W | 3.600              | 666                                   | Magnetometer, UCLA-Vectorial-Flux Gate. Muon telescope, 3 channels. Neutron monitor IGY, 3 channels, He-3. UTC by GPS receiver.                                                                             | 2003-2017 |
| Los Cerrillos (OLC) | Santiago de Chile, Chile      | 33°29'42.2" S.<br>70°42'59.81 W | 570                | 955                                   | Magnetometer, UCLA-Vectorial-Flux Gate. Multi-directional muon telescope, 7 channels. Neutron monitor 6NM64, 3 channels, BF-3. UTC by GPS receiver.                                                         | 1958-2017 |
| LARC                | King George Island, Antarctic | 62°12'9"S.<br>58°57'42" W       | 40                 | 980                                   | Magnetometer, UCLA-Vectorial-Flux Gate. Neutron monitor 6NM64 - BF-3BF-3. 6 channels. Neutron monitor 3NM64 - He-3. 3 channels. Neutron monitor 3NM64 - He-3. [Flux meter] 3 channels. UTC by GPS receiver. | 1990-2017 |

**Table 1**

| Event        | Magnitude [Mw] | Radius r [km] | Station Distance from earthquake [km] |
|--------------|----------------|---------------|---------------------------------------|
| Maule 2010   | 8.8            | ~6100         | Putre ~ 2030                          |
| Iquique 2014 | 8.2            | ~3360         | Putre ~ 300                           |
| Illapel 2015 | 8.3            | ~3700         | IPM ~ 3700                            |

**Table 2**
